# Supplementary material for: Optocapacitive Generation of Action Potentials by Microsecond Laser Pulses of Nanojoule Energy
Source: PubMed Central journal article supplement — Biophys J. 2017 Dec 19;114(2):283–8. doi: 10.1016/j.bpj.2017.11.018 (PMC5984948; doi:10.1016/j.bpj.2017.11.018), 2017-12-19
Supplement: mmc2.pdf [file mmc2.pdf]

# Optocapacitive Generation of Action Potentials by Microsecond Laser Pulses of Nanojoule Energy

João L. Carvalho-de-Souza,<sup>1</sup> Bernardo I. Pinto,<sup>1,3</sup> David R. Pepperberg,<sup>4,\*</sup> and Francisco Bezanilla<sup>1,2,\*</sup>

<sup>1</sup>Department of Biochemistry and Molecular Biology and <sup>2</sup>Institute for Biophysical Dynamics, The University of Chicago, Chicago, Illinois;

<sup>3</sup>Centro Interdisciplinario de Neurociencias de Valparaíso, Universidad de Valparaíso, Valparaíso, Chile; and <sup>4</sup>Lions of Illinois Eye Research Institute, Department of Ophthalmology and Visual Sciences, University of Illinois at Chicago, Chicago, Illinois

**ABSTRACT** Millisecond pulses of laser light delivered to gold nanoparticles residing in close proximity to the surface membrane of neurons can induce membrane depolarization and initiate an action potential. An optocapacitance mechanism proposed as the basis of this effect posits that the membrane-interfaced particle photothermally induces a cell-depolarizing capacitive current, and predicts that delivering a given laser pulse energy within a shorter period should increase the pulse's action-potential-generating effectiveness by increasing the magnitude of this capacitive current. Experiments on dorsal root ganglion cells show that, for each of a group of interfaced gold nanoparticles and microscale carbon particles, reducing pulse duration from milliseconds to microseconds markedly decreases the minimal pulse energy required for AP generation, providing strong support for the optocapacitance mechanism hypothesis.

The artificial stimulation of neuronal activity with light is a topic of major interest in neuroscience research. Recently, we presented a technique that enables light-induced depolarization and resulting action potential (AP) generation by excitable cells. Unlike optogenetics or optopharmacology (1–10), it does not require either genetic modification of the neuron or the development/preparation of a chemical photoswitch. The mechanism whereby the technique works was unveiled by Shapiro et al. (11), who demonstrated that IR radiation is able to increase the cell membrane temperature and increase its electric capacitance. The current needed to satisfy the equation  $Q = C \times V$  depolarizes the membrane, reaching its excitation voltage threshold and eliciting an action potential. The amount of change in temperature is small, but it occurs quickly, a property that led Shapiro et al. (11) to hypothesize and show a capacitance change during IR pulses. However, IR radiation is absorbed by water in the bulk medium, yielding slow and spatially imprecise photostimulation and requiring more light energy to boost the generated capacitive current. As a means of increasing the spatial localization and, potentially, the physiological effectiveness of the photostimulus, we have investigated the ability of 20 nm spherical gold nanoparticles (AuNPs) to serve as light-to-heat transducers

when positioned close to neuronal membranes by specific binders (12). These experiments, which involved 532 nm laser pulses (a wavelength that penetrates water well and is near the peak of the plasmon absorbance band of these AuNPs), indicated robust light-induced AP generation with millisecond flashes, and provided further evidence for the dependence of this photoresponsiveness on a thermally induced change in membrane capacitance. Based on the evident role of membrane capacitance change in transducing light energy into cell depolarization and AP generation, we have adopted the term “optocapacitance” to refer to the technique and the hypothesized operative mechanism.

The optocapacitance mechanism posits that a temperature-induced change in capacitance ( $C_m$ ) establishes a charge debt that is met by depolarization of the membrane. It is then reasonable to suspect that if the capacitance changes more quickly, the necessary charge debt can be achieved within a shorter time ( $t$ ) period of stimulation (the duration of the light pulse). Conceptually, the greater the value of  $dC_m/dt$ , the larger is the current which, in turn, will produce more membrane depolarization, thus making it easier to reach excitation threshold. Most importantly, at the moment of initiation of a virtually square pulse of laser energy to the preparation, the system exhibits a maximum rate of temperature change and thus of capacitance change. Over the duration of the pulse, the rate of change in temperature, and thus the rate of capacitance change, decreases continuously, making necessary the delivery of more energy to the

Submitted September 13, 2017, and accepted for publication November 14, 2017.

\*Correspondence: [davipepp@uic.edu](mailto:davipepp@uic.edu) or [fbezanilla@uchicago.edu](mailto:fbezanilla@uchicago.edu)

Editor: Brian Salzberg.

<https://doi.org/10.1016/j.bpj.2017.11.018>

© 2017 Biophysical Society.

This is an open access article under the CC BY-NC-ND license (<http://creativecommons.org/licenses/by-nc-nd/4.0/>).

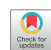

system. To formulate this quantitatively, we represent the equivalent circuit of the membrane with its capacitance, membrane resistance, and batteries as shown in Fig. 1 A. We make the cell membrane capacitance  $C_m$  a function of the time-dependent ( $t$ -dependent) change in temperature  $T$  (i.e.,  $C_m = C_m(T(t))$ ), and the current needed to charge or discharge the capacitance (capacitive current,  $i_c$ ) is given by the time derivative of the equation that relates  $C_m$  and voltage across the capacitor  $V - V_s$  with the transmembrane charge difference  $Q$ . That is,

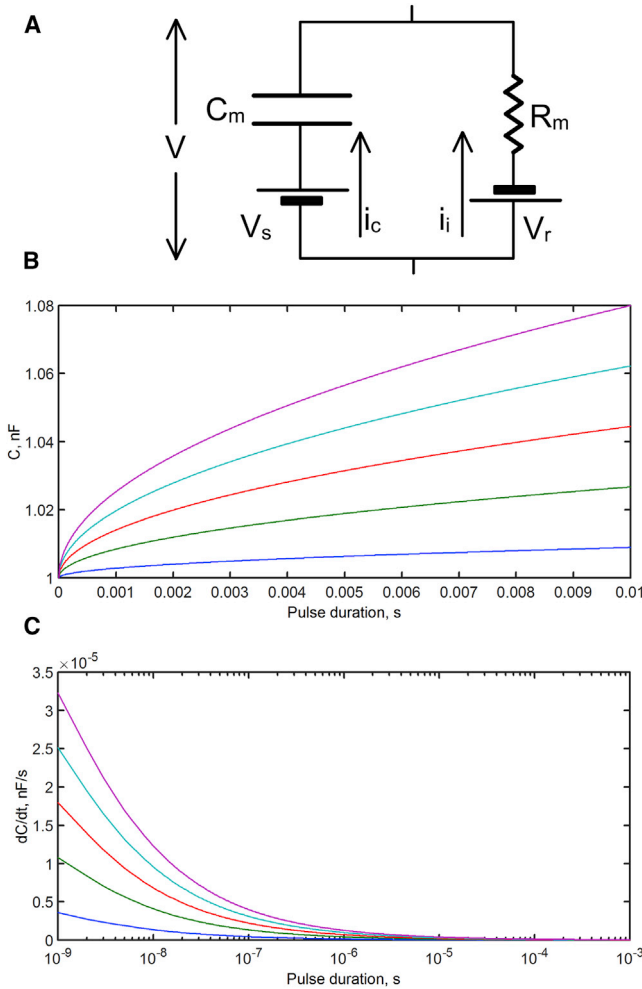

**FIGURE 1** Theoretical prediction of increased efficiency of optocapacitance as photostimulating pulse duration is decreased. (A) Equivalent circuit of the membrane shows  $V$  as the transmembrane voltage,  $C_m$  as the membrane capacitance,  $V_s$  as the net surface potential of the membrane,  $i_c$  as the capacitive current,  $R_m$  as the membrane resistance,  $V_r$  as the reversal potential of the ionic current, and  $i_i$  as the ionic current. Arrows indicate the outward current direction. (B) Plots of Eq. 7 predict the fractional increase in  $C_m$  during laser pulses of different powers with the highest as the top trace and the lowest as the bottom trace. (C) Time derivative of  $C_m$  that was plotted in (B), predicting that  $i_c$  is highest at the time of pulse initiation and then decays with time. To see this figure in color, go online.

$$Q = C_m(V - V_s), \quad (1a)$$

$$\begin{aligned} i_c &= \frac{dQ}{dt} = C_m \frac{d(V - V_s)}{dt} + (V - V_s) \frac{dC_m}{dt} \\ &= C_m \frac{dV}{dt} + (V - V_s) \frac{dC_m}{dt}, \end{aligned} \quad (1b)$$

where  $V$  is the membrane potential and  $V_s$  is the net surface potential of the membrane. The current through the ionic conductances,  $i_i$ , depends on the conductances and their reversal potentials and can be represented by a Thevenin equivalent as

$$i_i = \frac{V - V_r}{R_m}, \quad (2)$$

where  $R_m$  is the membrane resistance and  $V_r$  is the Thevenin potential that corresponds to the membrane potential in a resting cell. In the absence of any stimulation of the cell, the total membrane current ( $i_c + i_i$ ) is zero, therefore we can write

$$\frac{dV}{dt} = - \left( \frac{(V - V_s)}{C_m(t)} \frac{dC_m}{dt} + \frac{V - V_r}{C_m(t)R_m} \right), \quad (3)$$

a differential equation that can be solved for  $V$ , knowing the time course of  $C_m$ . Central to this formulation is the notion that the instantaneous magnitude of  $C_m$  is a function of the prevailing temperature. Therefore, a fast change in temperature produces a large  $dC_m/dt$ , consequently changing the membrane voltage  $V$ . In 1965, Taylor determined that membrane capacitance increases  $\sim 1\%$  per degree K increase (13). A simple relation for the  $C_m$  dependence on temperature  $T$  is thus

$$C_m(T) = C_0 + C_0\gamma (T(t) - T_0), \quad (4)$$

where  $\gamma$  is  $\sim 0.01$  and  $T_0$  is a reference temperature. The value of  $T(t) - T_0$  is proportional to the power  $P$  of the incident laser pulse, and  $P = E/\Delta t$ , where  $E$  is the total energy and  $\Delta t$  is the pulse duration. The time dependence of the temperature change ( $T(t) - T_0$ ) produced by a given pulse power at the surface of the nanoparticle of radius  $b$  can be obtained from the solution of the heat equation published by Carvalho-de-Souza et al. (12):

$$\begin{aligned} T(b, t) - T_0 &= \frac{A_0\alpha}{k} \left[ \sqrt{\frac{t}{\alpha\pi}} \left( b \exp\left[\frac{-b^2}{4\alpha t}\right] \right) \right. \\ &\quad \left. + t - \left( t + \frac{b^2}{2\alpha} \right) \operatorname{erfc}\left[\frac{b}{2\sqrt{\alpha t}}\right] \right]. \end{aligned} \quad (5)$$

Here,  $\alpha$  and  $k$  are the thermal diffusivity and conductivity of water, respectively, and  $A_0$  is the heat generated by the

particles during the laser pulse which is proportional to the power  $P$ . Thus,

$$T(b, t) - T_0 = cP \left[ \sqrt{\frac{t}{\alpha\pi}} \left( b \exp\left[\frac{-b^2}{4\alpha t}\right] \right) + t - \left( t + \frac{b^2}{2\alpha} \right) \operatorname{erfc}\left[\frac{b}{2\sqrt{\alpha t}}\right] \right] = P F(t), \quad (6)$$

where  $c$  is a constant that includes  $\alpha$ ,  $k$ , the fractional occupancy of the particles and the plasmon resonance properties of the gold particle (12), and where Eq. 6. defines the function  $F(t)$ . We can thereby write the time course of capacitance for a pulse of energy  $E$  and  $\Delta t$ :

$$C_m(t) = C_0 + C_0 \gamma E \frac{F(t)}{\Delta t}. \quad (7)$$

Fig. 1 B shows examples of the capacitance change during pulses of different power, and Fig. 1 C shows rates of change in capacitance for different pulse powers, with time shown in log scale. Because at shorter times the rate of change in temperature is maximal, the highest  $dC_m/dt$  occurs at the beginning of the pulse, and the occurrence of maximum  $dC_m/dt$  at pulse initiation is the main reason why shorter pulses are expected to be more efficient, because they require lower total energy in generating APs. We can obtain an estimate of the energy required to initiate an AP by solving Eq. 3 for  $V$  and determining how the threshold voltage  $V_{Th}$  (for simplicity, assumed constant) for AP initiation depends on parameters of the stimulating pulse. If the membrane resistance is very high, Eq. 3 can be solved analytically and, when combined with the temperature dependence of the capacitance Eq. 4, yields  $E_{Th}$ , the energy required for threshold:

$$E_{Th} = \Delta t \frac{V_r - V_{Th}}{\gamma F(t)(V_{Th} - V_s)}. \quad (8)$$

Because  $b^2$  is much larger than  $\alpha$ , for values of  $t$  ranging from 1  $\mu$ s to 10 ms, Eq. 6 reduces to

$$T(t) - T_0 = cP\sqrt{t} = P F(t), \quad (9)$$

and thus  $F(t)$  is proportional to  $\sqrt{t}$ . Replacing this time-dependence of  $F(t)$  in Eq. 8, we see that the energy required to reach threshold will increase with pulse duration as a power function with exponent of 1/2. The model thus predicts that, with decreasing pulse duration, more power but less total energy is required to reach AP threshold.

When stimulating with current pulses of amplitude ( $I$ ) and different durations ( $\Delta t$ ), the classical excitability curve to reach threshold is a hyperbolic relationship described by the Lapicque equation

$$I = b_r \left( 1 + \frac{c_r}{\Delta t} \right), \quad (10)$$

where  $b_r$  is the rheobase, and  $c_r$  is chronaxie (14). The current amplitude  $I$  is inversely proportional to  $\Delta t$  and the energy required to reach threshold shows a minimum at a duration equal to the chronaxie (14). In contrast, when stimulating with light pulses, the pulse amplitude (power) is inversely proportional to  $\sqrt{\Delta t}$  and the energy required to reach threshold increases monotonically with  $\sqrt{\Delta t}$  (see Eqs. 8 and 9).

To test the generality of the optocapacitance mechanism, and specifically to test the prediction that reducing  $\Delta t$  decreases  $E_{Th}$ , we investigated the ability of a group of plasmonic and nonplasmonic particles to enable light-induced AP generation by isolated, single-cell preparations of rat dorsal root ganglion (DRG) neurons under varying conditions of laser pulse energy and  $\Delta t$ . For each of the particle types, the investigation of AP generation involved the recording of pulse-by-pulse voltage responses to laser pulses of differing power/duration. For a given setting of pulse power/duration, the response of the cell was examined in a series of trials. These trials were conducted within consecutive 3-s intervals, and each trial consisted of a pair of stimuli. The first stimulus of each pair was a suprathreshold 1-ms depolarizing current injection pulse, intended to verify the neuron's excitability. The second stimulus, delivered 240 ms later, was a sweep-by-sweep time- and power-varying laser pulse. With laser pulses of fixed power and duration, we typically observed variability among trials in the time course of the membrane potential's approach to AP generation threshold, as well as the absence of AP generation in some trials. This variability can be attributed to normal intertrial fluctuations of the resting potential that affect AP generation threshold (15).

Near-infrared-absorbing gold nanorods (AuNRs), which offer advantages of importance to multiple areas of neuroscience research (16–19), were of particular interest for study. Fig. 2, A and B show membrane voltage responses of a DRG neuron that was treated with  $25 \times 94$  nm AuNRs. The illustrated AP responses and (in some trials) subthreshold responses were elicited by depolarizing current injection (*black traces*) and 785 nm laser pulses (*red traces*); in Fig. 2 B, representative single responses of each type are superimposed. The fact that nearly identical AP waveshapes were elicited by these differing ways of depolarizing the neuron to its AP threshold suggests that they injected nearly identical amounts of current in time. Fig. 2, C and D, shows responses of a different DRG neuron to laser pulses of varying duration (Fig. 2 C) and varying power (Fig. 2 D). Using the protocol described in Fig. 2 A, we varied the power and duration of laser pulses presented to AuNR-treated DRG neurons to determine the relationship between pulse duration  $\Delta t$  and  $E_{Th}$ , the minimal pulse energy at AP generation threshold. For these threshold determinations in the AuNR

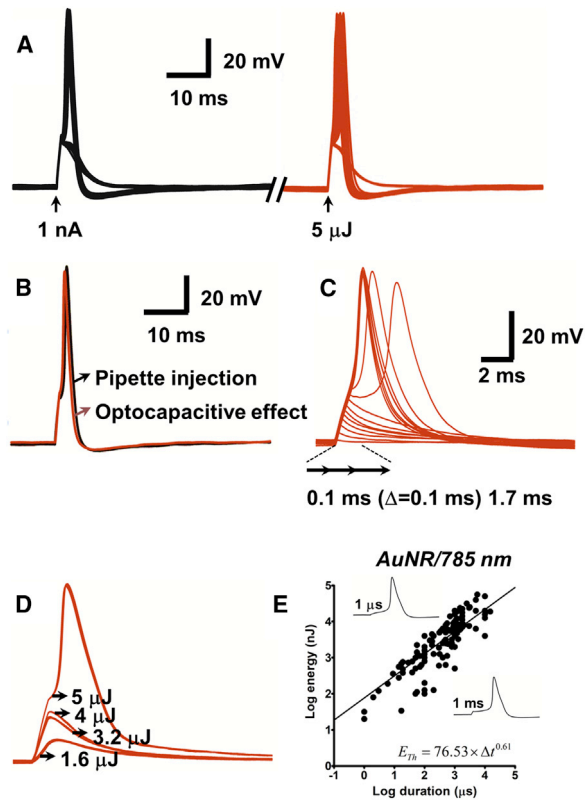

**FIGURE 2** Photosensitivity of DRG neurons mediated by  $25 \times 94$  nm AuNRs. All laser pulses were at 785 nm. (A) Given here are membrane voltage responses of a single cell to depolarizing current (1 nA, 1 ms) (*left traces*) and a 5  $\mu$ J laser pulse (5 mW, 1 ms) (*right traces*) delivered over a series of 37 trials. In recording sweeps where current injection failed to produce an AP, the laser pulse similarly failed to generate an AP. At the moment of laser pulse delivery, the membrane was clamped at  $I_m = 0$  A by the patch amplifier; all of the observed depolarizing current was thus due to the optocapacitive effect. Occurrences of subthreshold current-injection-induced and laser-pulse-induced responses are attributable to intertrial fluctuations. (B) Given here are pipette current injection-induced (*black trace*) and laser pulse-induced (*red trace*) APs recorded within the same 3-s trial. (C) Shown here are responses to 5.5-mW laser pulses of durations ranging from 0.1 to 1.7 ms in 0.1-ms increments. AP threshold was reached at a duration of 0.9 ms. (D) Given here are responses to 1-ms pulses of differing power (1.6–5  $\mu$ J). (E) Given here is a log-log plot of  $E_{Th}$  (minimal pulse energy required for AP generation) versus pulse duration ( $\Delta t$ ). Data were obtained from a total of 17 DRG neurons. (*Fitted line*) Given here is the power law relation  $E_{Th} = a\Delta t^b$ , with values of coefficient  $a$  and exponent  $b$  shown in the figure. (*Insets*) Given here are representative APs elicited by pulses of 1  $\mu$ s (76.5 mW, 76 nJ) and 1 ms (5.2 mW, 5.2  $\mu$ J). To see this figure in color, go online.

experiments, as in the other experiments described below, a pulse of given duration and power was taken as representing the minimal threshold energy  $E_{Th}$  when an AP was elicited by 50% of the presented pulses. Fig. 2 E shows, in log-log coordinates, the results of threshold energy determinations for cells treated with AuNRs. The function fitted to the

$E_{Th}-\Delta t$  data shows that the dependence of  $E_{Th}$  on  $\Delta t$  is well described by a power law function of exponent 0.61. That is, a 10-fold decrease in  $\Delta t$  was associated with a four-fold decrease in  $E_{Th}$ . Building on our earlier finding that treatment of DRG neurons with 20 nm AuNPs enables AP generation by 50  $\mu$ J laser pulses at 532 nm (12), we similarly investigated the relationship between  $E_{Th}$  and  $\Delta t$  in DRG neurons treated with this type of AuNP. Fig. 3 A shows that the  $E_{Th}-\Delta t$  plot for these cells exhibited a power law dependence of exponent 0.72, a value similar to that obtained with the  $25 \times 94$  nm AuNRs.

We conducted similar experiments on two types of carbon-based particles of dimensions  $\sim 2$   $\mu$ m: graphite particles (GrP), and meshes of  $5 \times 5000$  nm single-walled OH-functionalized carbon nanotubes (CNTm). We found that these two carbon-based materials can serve as light absorbers and subsequent heat emitters, similar to Si-based amorphous micrometer-size particles (20). With the use of 1-ms laser pulses of relatively high energy (3.7–7.6  $\mu$ J), we first confirmed that both of these carbon-based materials enable AP generation by DRG neurons. The presence of a single particle in evident contact with the neuron's surface membrane was sufficient to provide photosensitivity to the cell, enabling AP generation by laser pulses. Importantly, with the use of 405-nm laser pulses with CNTm-treated cells, irreversible depolarizations were produced, suggesting cell damage. This damage was prevented by the addition of a reducing agent (10 mM dithiothreitol) to the recording chamber. This finding is in line with previously reported deleterious effects of light-induced reactive oxygen species generated by the nanotubes (21) and by voltage-sensitive dye phototoxicity (22). No irreversible depolarization of CNTm-treated neurons was observed with 785-nm laser pulses, indicating that the damaging effect seen with 405-nm pulses was a consequence of reactive oxygen species generation by the higher-energy 405-nm photons. Using these carbon-based materials as light absorbers, we obtained  $E_{Th}-\Delta t$  plots for each material/laser-wavelength pair. As shown in Fig. 3, B–E, results obtained with GrP/532 nm (Fig. 3 B), GrP/405 nm (Fig. 3 C), CNTm/405 nm (Fig. 3 D), and CNTm/785 nm (Fig. 3 E) exhibited power law dependences of exponents 0.76, 0.60, 0.72, and 0.79, respectively.

These results show that, despite differences in the structure, composition and plasmonic versus nonplasmonic light absorption properties among the investigated materials, photoexcitation of these materials in close proximity to the surface membrane of DRG neurons enables AP generation. The APs induced upon light absorption by these differing materials exhibit similar waveforms. Furthermore, energy thresholds for AP generation mediated by these materials exhibit remarkably similar power law dependences on laser pulse duration, and the nearly common value ( $\sim 0.7$ ) of the exponent for these power law relationships is robust, representing an approximately fivefold decrease in energy  $E_{Th}$



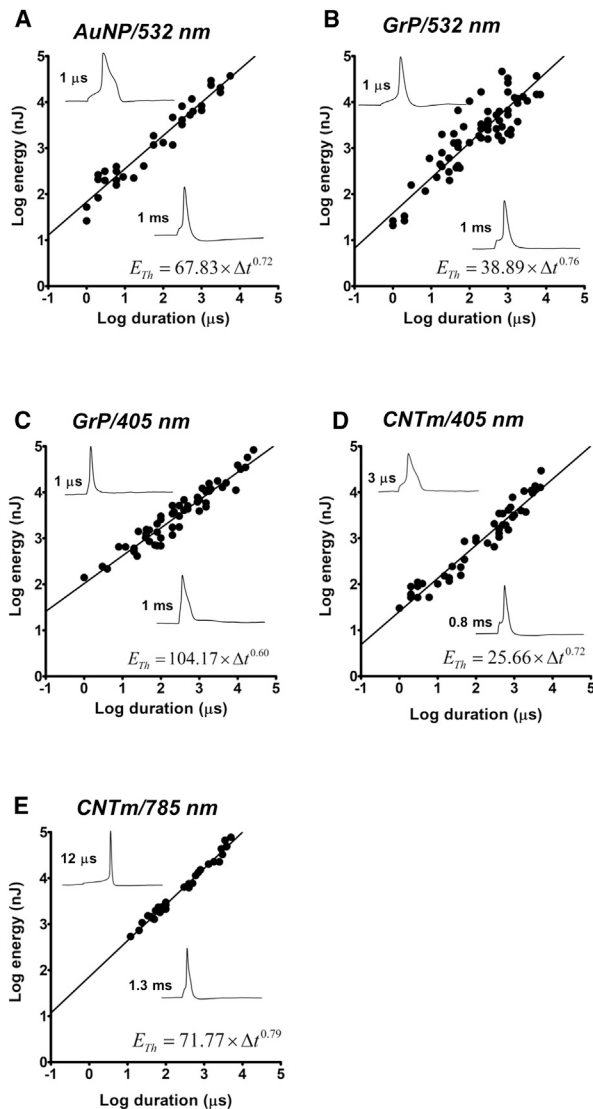

**FIGURE 3** Photosensitivity mediated by 20 nm AuNPs and carbon-based microparticles. Shown here are log-log plots of laser pulse energy  $E_{Th}$  versus pulse duration. DRG neurons treated with 20 nm spherical AuNPs (A),  $\sim 2 \mu\text{m}$  GrPs (B and C), or  $\sim 2 \mu\text{m}$  CNTms (D and E) received laser pulses of 532 nm (A and B), 405 nm (C and D), or 785 nm (E). Results in (A–E) were obtained, respectively, from a total of 6, 10, 11, 9, and 5 cells. Fitted lines plot the illustrated power law relations. (Insets) Representative responses obtained with pulses are as follows: in (A), 67.8 mW, 67.8 nJ is for the 1  $\mu\text{s}$  pulse and 9.8 mW, 9.8  $\mu\text{J}$  is for the 1 ms pulse; in (B), 38.89 mW and 38.9 nJ is for the 1  $\mu\text{s}$  pulse, and 7.41 mW and 7.41  $\mu\text{J}$  is for the 1 ms pulse; in (C), 104.17 mW and 104.17 nJ is for the 1  $\mu\text{s}$  pulse, and 6.57 mW and 6.57  $\mu\text{J}$  is for the 1 ms pulse; in (D), 18.8 mW and 56.6 nJ is for the 3  $\mu\text{s}$  pulse, and 3.95 mW and 3.158  $\mu\text{J}$  is for the 0.8 ms pulse; and in (E), 42.5 mW and 510 nJ is for the 12  $\mu\text{s}$  pulse, and 15.92 mW and 20.7  $\mu\text{J}$  is for the 1.3 ms pulse.

for a 10-fold decrease in pulse duration. We interpret these findings as strong indication that light-induced AP generation with these materials has its basis in an optocapacitance mechanism in which cell membrane heating by the gold nano-

particles, GrPs, or CNTms is transduced into cell depolarization by a capacitive current resulting from a change in membrane capacitance. Additional support for this conclusion comes from the similar power law dependence of the model and the experimentally determined exponent. The discrepancy between Eqs. 8 and 9 that gives an exponent of 0.5 and the experimental value of  $\sim 0.7$  can be explained by two factors. First, Eq. 8 is the solution of Eq. 3, assuming infinite membrane resistance. When the membrane resistance is considered in solving Eq. 3, the exponent increases. Second, the model assumes a constant threshold for AP generation regardless of pulse duration. This constancy is a simplification because, as the depolarization is prolonged, the threshold increases due to sodium channel inactivation, thus necessitating even more energy for pulses of long duration.

Beyond providing, to our knowledge, new information relevant to the optocapacitance hypothesis, the results show that interfacing a variety of light-absorbing materials ranging from nanometers to micrometers in size with the surface membrane enables AP generation by excitable cells with laser pulses in the nanojoule energy range. The AP-inducing capacity of pulse energies as low as several nanojoules, which indicates a photosensitivity of the optocapacitance technique considerably greater than that previously demonstrated (12), is a finding of importance to maximizing the biocompatibility of the technique, i.e., to minimizing the delivered light energy required for neural stimulation. Overall, these data encourage further development of the optocapacitance technique as a possible alternative to optogenetic or optopharmacological approaches to achieve photocontrol of AP generation, by a single light pulse, with the capability to control cell excitability with microseconds of radiation pulses. Of particular interest also is our demonstration that the  $25 \times 94 \text{ nm}$  AuNRs are able to induce photosensitivity in neurons with the use of near-infrared (785 nm) radiation. This wavelength is preferable to 532 nm, used with 20 nm AuNPs, because it avoids the absorption by hemoglobin, and it is in the optical window of choice for living tissue penetration by avoiding absorption by water at wavelengths longer than 900 nm. This finding is important because it introduces a rapid and efficient way to stimulate neurons with deep penetrating radiation, a property highly desirable for in vivo research investigations and possibly for clinical applications.

## SUPPORTING MATERIAL

Supporting Materials and Methods are available at [http://www.biophysj.org/biophysj/supplemental/S0006-3495\(17\)31247-X](http://www.biophysj.org/biophysj/supplemental/S0006-3495(17)31247-X).

## AUTHOR CONTRIBUTIONS

F.B., D.R.P., and J.L.C.-d.-S. designed research, analyzed data, and wrote the manuscript. J.L.C.-d.-S. and B.I.P. performed research. F.B. contributed analytic tools.

## ACKNOWLEDGMENTS

We thank Ms. Li Tang for assistance with DRG cell preparations.

J.L.C.-d.-S., B.I.P., D.R.P., and F.B. acknowledge support by National Institutes of Health (NIH) grants R01-GM030376, R21-EY023430, and R21-EY027101. D.R.P. acknowledges funding received from Research to Prevent Blindness (New York, NY) and Search for Vision (Cicero, IL). B.I.P. acknowledges fellowship support from CONICYT-PFCHA Doctorado Nacional 2017 and the Centro Interdisciplinario de Neurociencia de Valparaiso, a Millennium Institute (P09-022-F).

## REFERENCES

1. Boyden, E. S., F. Zhang, ..., K. Deisseroth. 2005. Millisecond-timescale, genetically targeted optical control of neural activity. *Nat. Neurosci.* 8:1263–1268.
2. Hochbaum, D. R., Y. Zhao, ..., A. E. Cohen. 2014. All-optical electrophysiology in mammalian neurons using engineered microbial rhodopsins. *Nat. Methods.* 11:825–833.
3. Cosentino, C., L. Alberio, ..., A. Moroni. 2015. Optogenetics. Engineering of a light-gated potassium channel. *Science.* 348:707–710.
4. Deisseroth, K. 2015. Optogenetics: 10 years of microbial opsins in neuroscience. *Nat. Neurosci.* 18:1213–1225.
5. Valeeva, G., T. Tressard, ..., R. Khazipov. 2016. An optogenetic approach for investigation of excitatory and inhibitory network GABA actions in mice expressing Channelrhodopsin-2 in GABAergic neurons. *J. Neurosci.* 36:5961–5973.
6. Lester, H. A., M. E. Krouse, ..., B. F. Erlanger. 1980. A covalently bound photoisomerizable agonist: comparison with reversibly bound agonists at Electrophorus electroplaques. *J. Gen. Physiol.* 75:207–232.
7. Volgraf, M., P. Gorostiza, ..., D. Trauner. 2006. Allosteric control of an ionotropic glutamate receptor with an optical switch. *Nat. Chem. Biol.* 2:47–52.
8. Fortin, D. L., M. R. Banghart, ..., R. H. Kramer. 2008. Photochemical control of endogenous ion channels and cellular excitability. *Nat. Methods.* 5:331–338.
9. Yue, L., M. Pawlowski, ..., D. R. Pepperberg. 2012. Robust photoregulation of GABA<sub>A</sub> receptors by allosteric modulation with a propofol analogue. *Nat. Commun.* 3:1095.
10. Levitz, J., J. Broichhagen, ..., E. Y. Isacoff. 2017. Dual optical control and mechanistic insights into photoswitchable group II and III metabotropic glutamate receptors. *Proc. Natl. Acad. Sci. USA.* 114:E3546–E3554.
11. Shapiro, M. G., K. Homma, ..., F. Bezanilla. 2012. Infrared light excites cells by changing their electrical capacitance. *Nat. Commun.* 3:736.
12. Carvalho-de-Souza, J. L., J. S. Treger, ..., F. Bezanilla. 2015. Photosensitivity of neurons enabled by cell-targeted gold nanoparticles. *Neuron.* 86:207–217.
13. Taylor, R. E. 1965. Impedance of the squid axon membrane. *J. Cell. Comp. Physiol.* 66:21–25.
14. Geddes, L. A. 2004. Accuracy limitations of chronaxie values. *IEEE Trans. Biomed. Eng.* 51:176–181.
15. Cole, K. S., R. Guttman, and F. Bezanilla. 1970. Nerve membrane excitation without threshold. *Proc. Natl. Acad. Sci. USA.* 65:884–891.
16. Eom, K., J. Kim, ..., S. J. Kim. 2014. Enhanced infrared neural stimulation using localized surface plasmon resonance of gold nanorods. *Small.* 10:3853–3857.
17. Paviolo, C., A. C. Thompson, ..., P. R. Stoddart. 2014. Nanoparticle-enhanced infrared neural stimulation. *J. Neural Eng.* 11:065002.
18. Eom, K., C. Im, ..., S. J. Kim. 2016. Synergistic combination of near-infrared irradiation and targeted gold nanoheaters for enhanced photo-thermal neural stimulation. *Biomed. Opt. Express.* 7:1614–1625.
19. Paviolo, C., and P. R. Stoddart. 2017. Gold nanoparticles for modulating neuronal behavior. *Nanomaterials (Basel).* 7. <https://doi.org/10.3390/nano704009>.
20. Jiang, Y., J. L. Carvalho-de-Souza, ..., B. Tian. 2016. Heterogeneous silicon mesostructures for lipid-supported bioelectric interfaces. *Nat. Mater.* 15:1023–1030.
21. Rajavel, K., R. Gomathi, ..., R. T. Rajendra Kumar. 2014. In vitro bacterial cytotoxicity of CNTs: reactive oxygen species mediate cell damage edges over direct physical puncturing. *Langmuir.* 30:592–601.
22. Cohen, L. B., and B. M. Salzberg. 1978. Optical measurement of membrane potential. In *Reviews of Physiology, Biochemistry and Pharmacology, Vol. 83*. Springer, Berlin, Germany, pp. 35–88.

**Biophysical Journal, Volume 114**

**Supplemental Information**

**Optocapacitive Generation of Action Potentials by Microsecond Laser  
Pulses of Nanojoule Energy**

**João L. Carvalho-de-Souza, Bernardo I. Pinto, David R. Pepperberg, and Francisco  
Bezanilla**

## Methods

### DRG neuron preparation

Dorsal root ganglia were removed from 1-3 days old Sprague-Dawley rats following euthanasia and were immediately placed in ice-cold Dulbecco Modified Eagle Medium (DMEM). The tissue was rinsed multiple times with modified Earle's balanced salt solution (EBSS, see composition below), then digested with 0.25% trypsin in EBSS for 20 minutes at 37° C under mild shaking. The trypsin-treated tissue was then centrifuged, the supernatant was discarded, and the softened tissue was resuspended in EBSS + 10 % FBS for mechanical trituration with Pasteur pipettes of decreasing tip sizes. Following a final centrifugation of the cells and removal of the supernatant, the cells were supplemented with DMEM + 5 % FBS. Cells were seeded into sterilized poly-L-lysine solution-treated glass-bottom culture dishes and allowed to sit for 30 minutes to facilitate DRG neuron adhesion to the glass. A 2.5 ml volume of DMEM + 5 % FBS + 100 U/ml penicillin + 100 µg/ml streptomycin was then added to the dish, and the cells were incubated at 37 °C with 5 % CO<sub>2</sub> until use.

### Experimental setup

Dishes containing DRG neurons and bath solution (see composition below) were mounted on a Zeiss IM 35 microscope (Carl Zeiss Microscopy, Thornwood, New York) and visualized through objective lenses ranging from 10x/0.25NA to 40x/0.55NA. Patch pipettes were pulled on a Sutter Instruments P-2000 CO<sub>2</sub> laser micropipette puller (Novata, California) and flame polished to produce approximately 2 MΩ resistances when filled with internal pipette solution (see composition below). An analog waveform from an AD/DA converter board (Innovative Integration SBC-6711-A4D4, Simi Valley, CA) drove the amplifier (Axopatch 200B, Molecular Devices, Sunnyvale, California) to clamp the current through the cell's membrane. The amplifier output, the membrane voltage, was digitized at 16-bit resolution and sampled at 20 kHz by the same AD/DA converter board and stored in a personal



computer for analysis. The AD/DA converter board was controlled by customized software. The laser source used in a given experiment (405 nm diode laser, HangZhou NaKu Technology Co. Ltd, HangZhou, China; 532 nm DPSS laser, UltraLasers, Ontario, Canada; or 785 nm diode laser, Laserglow Technologies, Toronto, Canada) was mounted and aligned to the central axis of the microscope objective. TTL-controlled acousto-optic-modulators were used with 532 nm (NEOS Technologies, Gooch & Housego, PLC., Melbourne, Florida) and 785 nm (Brimrose Corporation of America, Sparks, ND, USA) laser lines to enable presentation of the faster laser pulses. The 405 nm laser line was TTL-modulated directly. In all cases, the power of the laser beam incident on the cell preparation was adjusted with the use of neutral density filters (Thorlabs Inc., Newton, NJ, USA). The focused laser beam, a spot with diameter of about 5  $\mu\text{m}$  (about 1/5 of the cell diameter), was centered on the cell under investigation in the experiments with AuNPs and AuNRs, and on a cell-associated GrP or CNTm particle in experiments with these carbon-based materials.

## **Materials and solutions**

### **Material suppliers:**

Saline components, streptomycin (Cat #: S6501), penicillin (Cat #: 13750) and poly-L-lysine (Cat #: P8920): Sigma-Aldrich, St. Louis, Missouri, USA.

Trypsin (Cat # TRL3): Worthington, Lakewood, New Jersey, USA.

Fetal bovine serum (FBS, Cat # 30-2020): ATCC, Manassas, Virginia, USA.

DMEM (Cat # 21063-029): Life Technologies, Grand Island, New York, USA.

Gold nanorods (AuNRs, Cat # C12-25-780-TS-50) and spherical gold nanoparticles (AuNPs, Cat # C11-20-TS-50): Nanopartz, Inc. Loveland, Colorado, USA.

Graphite particles (GrPs, Cat # SA090315): XG Sciences, Inc. Lansing, Missouri, USA.

Carbon nanotubes meshes (CNTms, Cat # SKU 010402): Cheap Tubes Inc. Cambridgeport, Vermont, USA.

Solutions concentrations are in mM unless otherwise stated:

EBSS: 132 NaCl, 5.3 KCl, 1 NaH<sub>2</sub>PO<sub>4</sub>, 10 HEPES, 5.5 glucose, pH 7.4.

Patch bath solution: 132 NaCl, 6 KCl, 1.8 CaCl<sub>2</sub>, 1.2 MgCl<sub>2</sub>, 10 HEPES, 5 glucose, pH 7.4.

Patch pipette solution: 150 KF, 10 NaCl, 4.5 MgCl<sub>2</sub>, 2 ATP, 9 EGTA, 10 HEPES, pH 7.4.

### **Materials features and their delivery to DRG neurons**

The AuNRs used in the present experiments were of diameter 25 nm and length 94 nm (aspect ratio: 3.8), and exhibit strong plasmonic light absorption with a peak at 780 nm. The AuNR preparation contained a solubilizing coating that included streptavidin molecules. However, in the present study, the streptavidin was not intended for use in anchoring the nanoparticles. Rather, the AuNR coating served merely to facilitate AuNR monodispersion in the recording buffer solution. AuNRs were prepared as a 10 nM solution in saline of composition identical to that of the cell bathing solution (12) and delivered to isolated single DRG neurons from a perfusion micropipette. The AuNPs, prepared at a concentration of 50 nM in bathing solution, were similarly superfused onto the DRG neurons.

Because the carbon-based GrP and CNTm particles used here absorb broadly over UV to near-IR wavelengths, we investigated the action of laser pulses at both 405 and 532 nm for GrP-treated cells, and 405 and 785 nm for CNTm-treated cells. The GrPs or CNTms were first suspended in a test tube and sonicated for 5 min in the cell bathing solution at 0.1% and 0.7% w/v concentration, respectively, then allowed to settle. After a 5-min period, a considerable portion of material had settled to the bottom of the test tube, and the remaining suspension consisted largely of GrPs or CNTms of 1-2  $\mu$ m in size. A 5  $\mu$ l volume of a suspension of one of these carbon-based particles was then drop-casted onto the DRG neurons in the dish. After 5 minutes, most of the carbon particles were at the bottom of the dish, many of them touching a side or on top of a neuron.

Using whole-cell current clamp, we recorded membrane voltage responses to laser pulses. Unless otherwise indicated, procedures for the presentation of laser pulses to the cells were similar to those previously described (12).
